# Supplementary material
Source: Springer Nature journal article supplement (https://www.springermedizin.de/resource/supplementary/13054_2011_499_MOESM1_ESM.pdf/9708618)
Supplement: MOESM1 [file 9708618]

**Patients assessed for eligibility**  
(SIRS & suspected infection, N=54)

**Excluded patients (n=32)**  
Reason for exclusion, n (%)  
1. Brain trauma injury, 8 (25 %)  
2. Stroke, 3 (9 %)  
3. Age > 70 years, 4 (12 %)  
4. Neuroleptic malignant syndrome, 2 (6 %)  
5. Awake patients, 15 (48 %)

**Included patients**  
(temperature continuous recordings for 24 hours, N =22)

**Infection**  
(Microbiological diagnosis within 48-72 hours post-recruitment, N=17, 77%)

**SIRS**  
(Group 1, N=5, 23%)

**Septic shock**  
(Development of hypotension during the 24 hours of temperature recordings, Group 3, N=7, 32%)

**SIRS + infection**  
(Sepsis, Group 2, N=10, 45%)
